# Supplementary material for: Influence of graphene oxide on rheology, mechanical, dielectric, and triboelectric properties of poly(vinyl alcohol) nanocomposite hydrogels prepared via a facile one step process
Source: Royal Society of Chemistry journal article supplement (doi:10.1039/d2sm01599d), 2023-01-01
Supplement: d2sm01599d1.pdf [file d2sm01599d1.pdf]

**Influence of Graphene Oxide on Rheology, Mechanical,  
Dielectric, and Triboelectric Properties of Poly (vinyl alcohol)  
Nanocomposite Hydrogels Prepared via Facile One Step Process**

*Swati Sharma<sup>1</sup>, Akanksha Adaval<sup>1</sup>, Shiva Singh<sup>2</sup>, Pradip K. Maji<sup>2</sup>, Cherumannil Karumuthil*

*Subash<sup>3</sup>, Valiyaveetil Haneefa Shafeeq<sup>1</sup>, Arup R. Bhattacharya<sup>1\*</sup>*

<sup>1</sup>Department of Metallurgical Engineering and Materials Science,

Indian Institute of Technology Bombay, Mumbai-400076, India

<sup>2</sup>Department of Polymer and Process Engineering, Indian Institute of Technology Roorkee,

Saharanpur Campus, Saharanpur 247001, India

<sup>3</sup>Centre for Nano and Soft Matter Sciences, Arkavathi Campus, Bengaluru-562162, India

## Supplementary Information

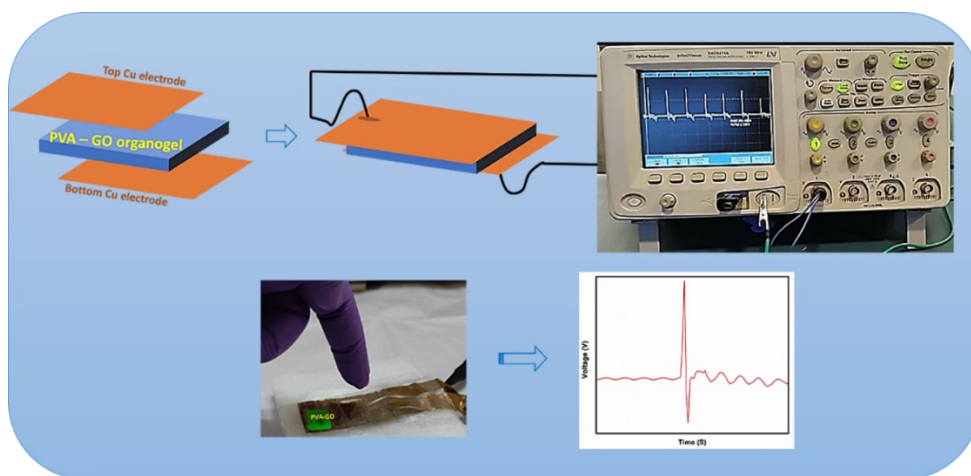

**Fig. S1** A Schematic representation for the piezoelectric device setup.

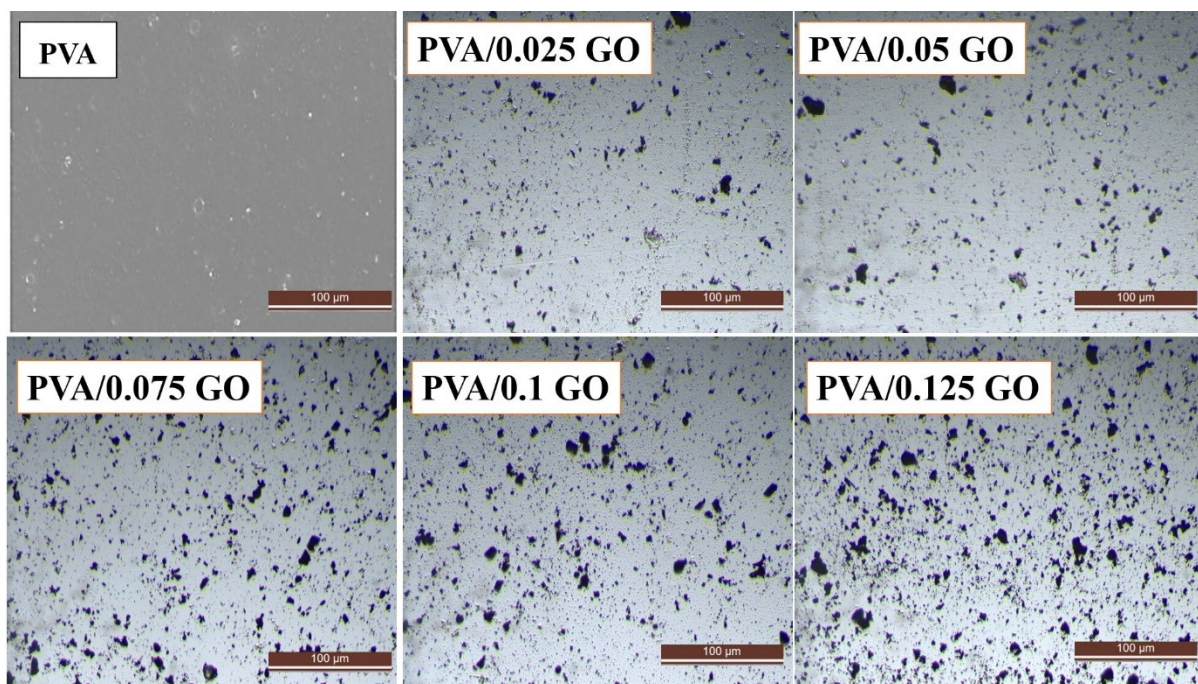

**Fig. S2** (a) Optical microscopic images of pure PVA hydrogel and PVA/GO nanocomposite hydrogels of varying GO concentration (0.025 – 0.125 wt.%) depicting GO 'agglomerate' in PVA matrix.

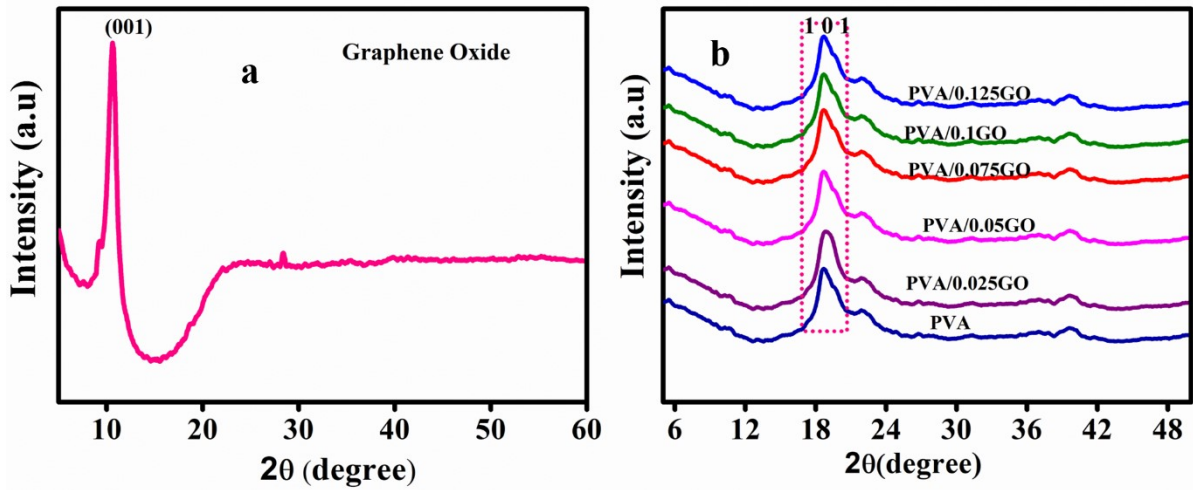

Fig. S3 (a) WAXD patterns of pristine GO, (b) neat PVA and PVA/GO nanocomposite hydrogels with different concentration of GO.

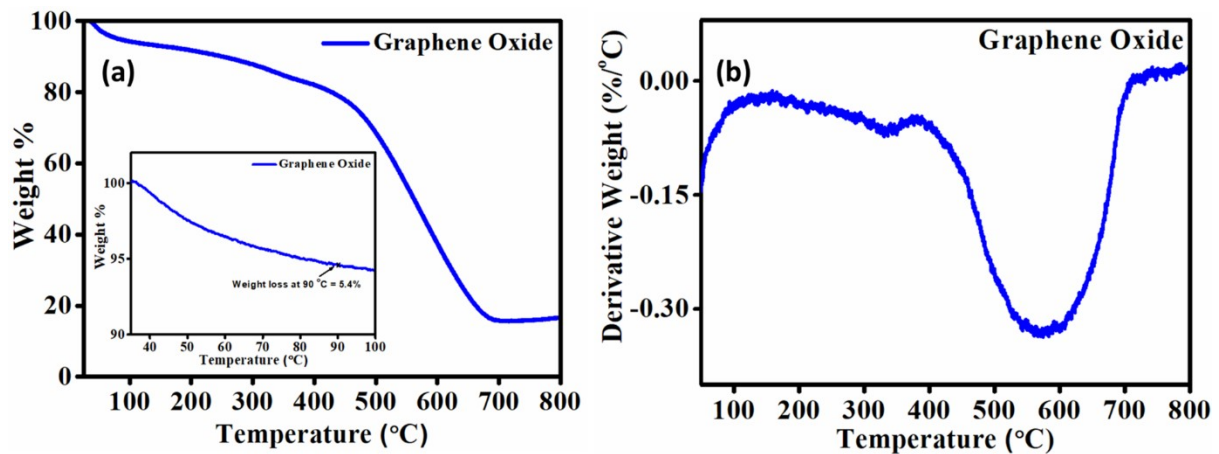

Fig. S4 TGA and DTGA plots of pristine graphene oxide in the range of 30 - 800 °C

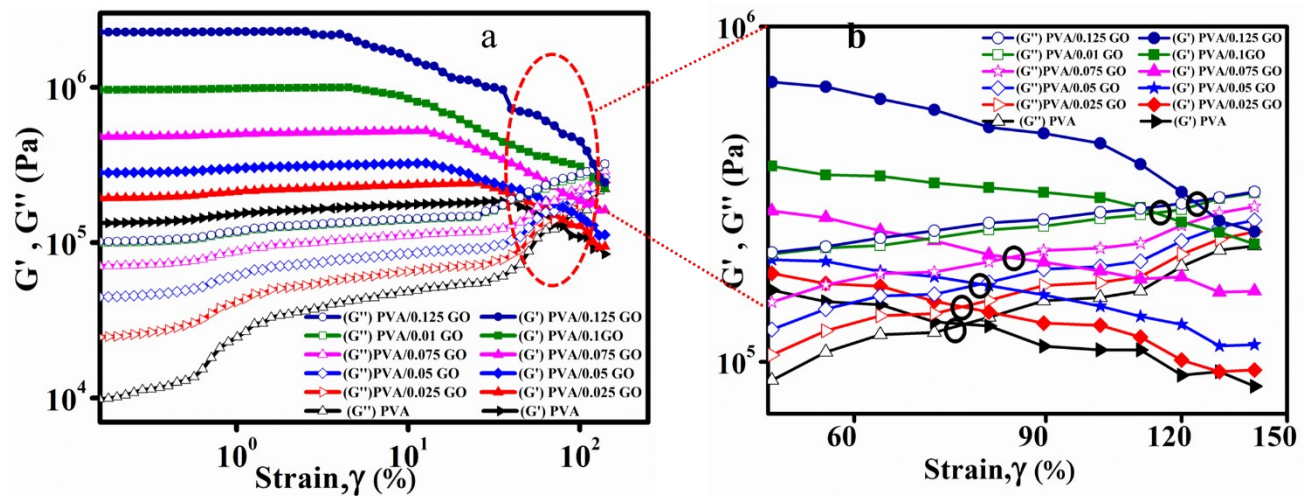

**Fig. S5** Amplitude sweep at 1Hz of PVA/GO nanocomposite hydrogel with varying concentration of GO.

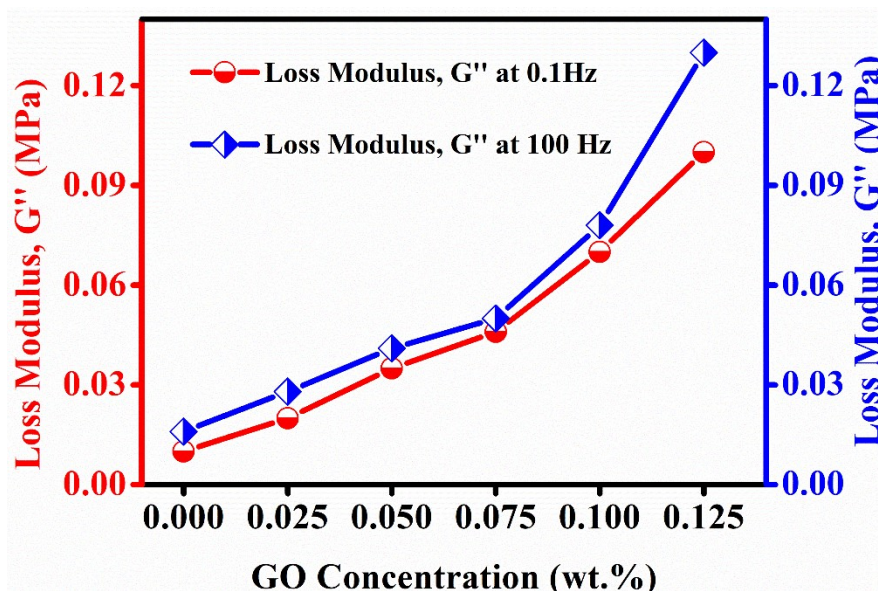

**Fig. S6** Loss modulus versus GO concentration of PVA/GO nanocomposite hydrogel at 0.1 and 100 Hz during frequency sweep.

**Table S1** The melting and crystallization parameters of PVA/GO nanocomposite hydrogel with different concentration of GO

| GO (wt.%)   | $T_m$ (°C) | $T_c$ (°C) | $\Delta H_m$ (J/g) | Crystallinity (%) |
|-------------|------------|------------|--------------------|-------------------|
| PVA         | 219        | 197.2      | 15.1               | 12.6              |
| PVA/0.025GO | 222        | 199.5      | 16.2               | 14                |
| PVA/0.05GO  | 223.4      | 200.5      | 16.4               | 14.5              |
| PVA/0.075GO | 224.0      | 202.3      | 17                 | 15.7              |
| PVA/0.1GO   | 225.9      | 203.3      | 18.1               | 17                |
| PVA/0.125GO | 226.1      | 206.4      | 21.5               | 20.8              |

**Table S2** The value of  $G'$  and  $G''$  at 0.1 and 100 Hz frequency during frequency sweep of PVA/GO nanocomposite hydrogel of varying GO concentration

| Sample      | $G'$ (MPa) at 0.1Hz | $G'$ (MPa) at 100Hz | $G''$ (MPa) at 0.1Hz | $G''$ (MPa) at 100Hz |
|-------------|---------------------|---------------------|----------------------|----------------------|
| PVA         | 0.13                | 0.26                | 0.01                 | 0.02                 |
| PVA/0.025GO | 0.18                | 0.30                | 0.02                 | 0.03                 |
| PVA/0.05GO  | 0.23                | 0.36                | 0.03                 | 0.04                 |
| PVA/0.075GO | 0.29                | 0.41                | 0.04                 | 0.05                 |
| PVA/0.1GO   | 0.48                | 0.61                | 0.07                 | 0.08                 |
| PVA/0.125GO | 0.63                | 0.71                | 0.09                 | 0.12                 |

**Table S3** Nanoindentation analysis of PVA/GO nanocomposite hydrogel with different concentration of GO

| Samples      | Hardness (MPa) | Young's Modulus (MPa) |
|--------------|----------------|-----------------------|
| Pristine PVA | 14.2           | 122                   |
| PVA/0.025 GO | 16.4           | 128                   |
| PVA/0.05 GO  | 27.4           | 168                   |
| PVA/0.075 GO | 34.3           | 195                   |
| PVA/0.1 GO   | 40.4           | 214                   |
| PVA/0.125 GO | 46.5           | 226                   |

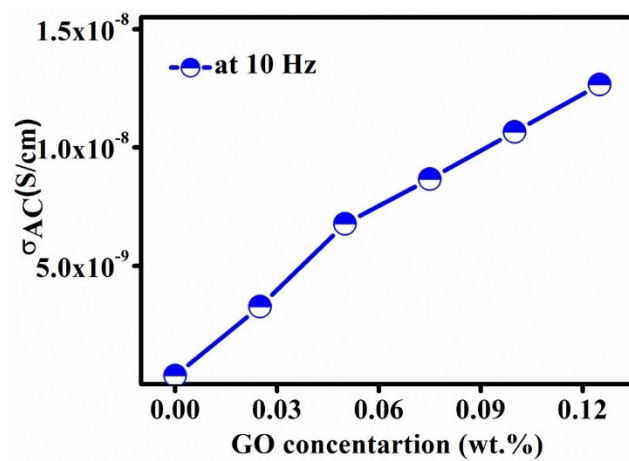

**Fig. S7** AC conductivity of PVA/GO nanocomposite hydrogel at 10 Hz frequency as a function of GO concentration at room temperature.
